# Supplementary material
Source: publisher figshare collection journal article supplement (https://frontiersin.figshare.com/ndownloader/files/11863112)
Supplement: Supplementary file [file 11863112]

Table S6: Adjusted p-values for 2-feeder Experiment (*Cry-2*)

|        | B18:00        | B09:00        | E18:00        | E09:00        | M18:00 |
|--------|---------------|---------------|---------------|---------------|--------|
| B09:00 | <b>0.0355</b> |               |               |               |        |
| E18:00 | 0.47          | <b>0.0305</b> |               |               |        |
| E09:00 | <b>0.0152</b> | 0.36          | <b>0.0127</b> |               |        |
| M18:00 | 0.38          | 0.09          | 0.35          | <b>0.0324</b> |        |
| M09:00 | 0.47          | <b>0.0302</b> | 0.47          | <b>0.0191</b> | 0.35   |
